# Supplementary material for: Free-standing lithiophilic Ag-nanoparticle-decorated 3D porous carbon nanotube films for enhanced lithium storage
Source: Royal Society of Chemistry journal article supplement (doi:10.1039/d0ra04579a), 2020-01-01
Supplement: d0ra04579a1.pdf [file d0ra04579a1.pdf]

**Supplemental Information**

**Free-standing lithiophilic Ag-nanoparticles-decorated 3D porous carbon nanotube film for  
stable lithium metal anode**

Fang Wu,<sup>a</sup> Heng Quan,<sup>a</sup> Jiang Han,<sup>a</sup> Xiaoli Peng,<sup>a</sup> Zongkai Yan,<sup>a</sup> Xiaokun Zhang,<sup>a</sup> and Yong  
Xiang<sup>\*a</sup>

<sup>a</sup> School of Materials and Energy, University of Electronic Science and Technology of China,  
Chengdu, 611731, China

\*Corresponding author.

Emails: [xyg@uestc.edu.cn](mailto:xyg@uestc.edu.cn) (Y. Xiang)

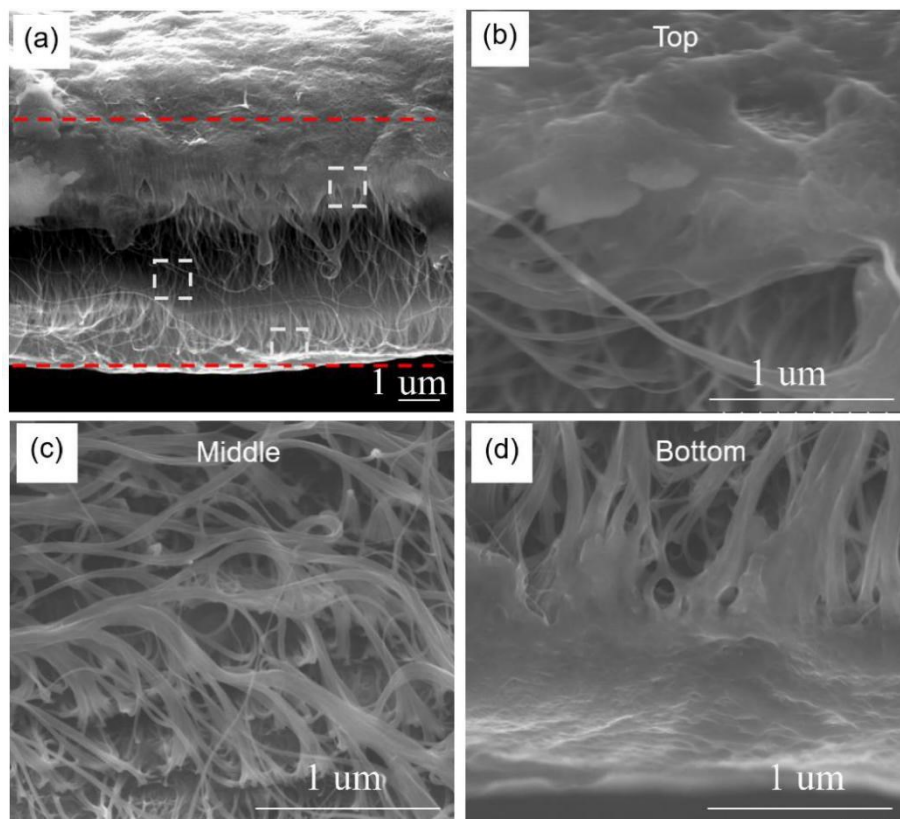

**Figure S1.** Cross sectional SEM images of the CNTs film.

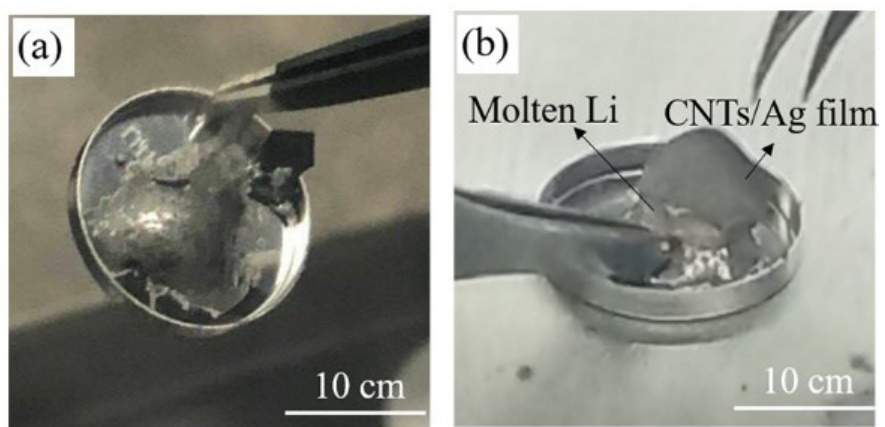

**Figure S2.** Digital photographs of CNTs film (a) and CNTs/Ag film (b) during thermal molten Li at 300 °C.

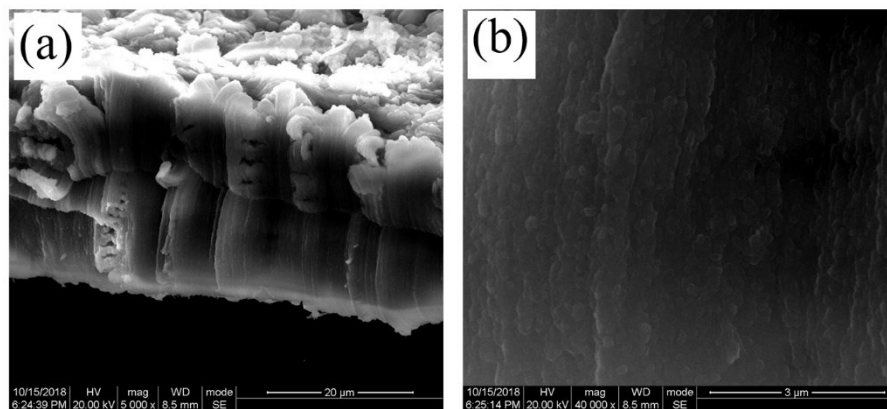

**Figure S3.** The cross-sectional SEM image of CNTs/Ag/Li film at a low magnification (a) and a high magnification (b).

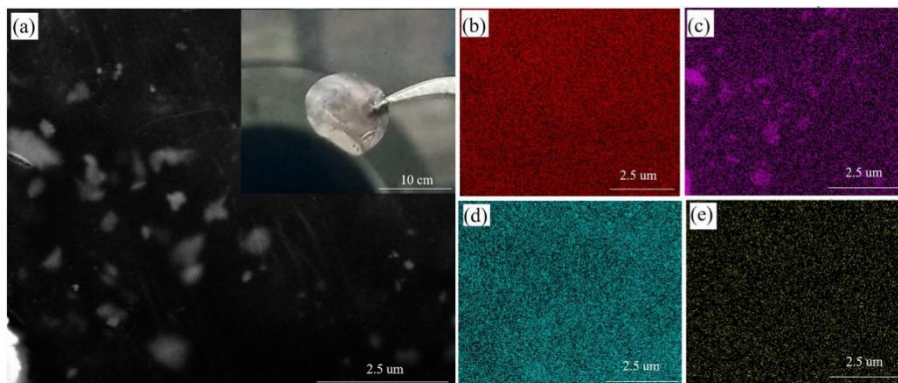

**Figure S4.** The cross-sectional SEM image of CNTs/Ag/Li film (a) and the corresponding elemental mapping of C (b), Ag (c), O (d), Li (e). the inset image in (a) is the optical photograph of CNTs/Ag/Li film.

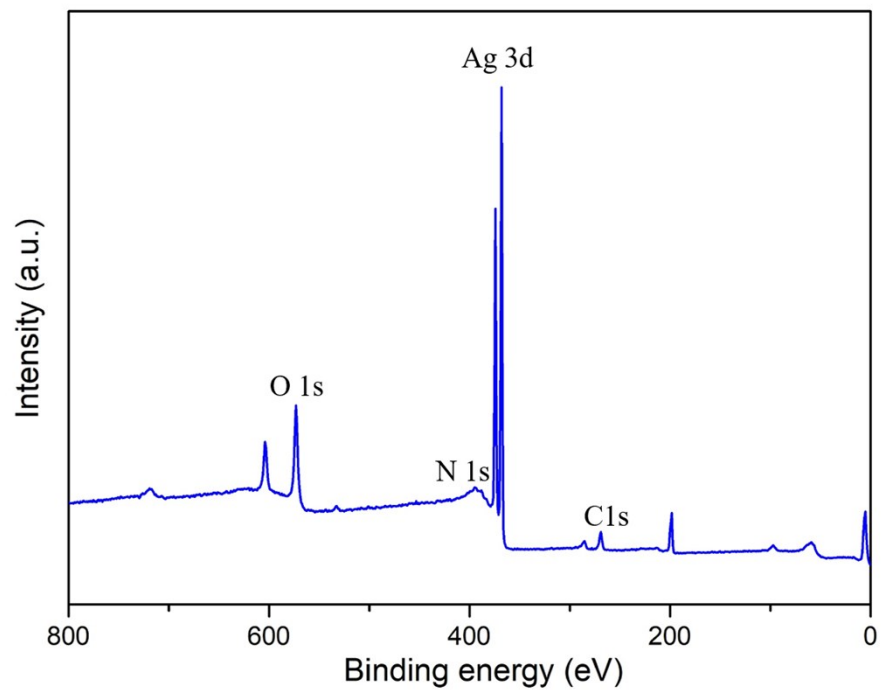

**Figure S5.** XPS spectrum of the CNTs/Ag/Li film.
